# Supplementary material
Source: PubMed Central journal article supplement (PMC2587588)
Supplement: 0806759105_0806759105SI.pdf [file 0806759105_0806759105SI.pdf]

# Supporting Information

Guisinger et al. 10.1073/pnas.0806759105

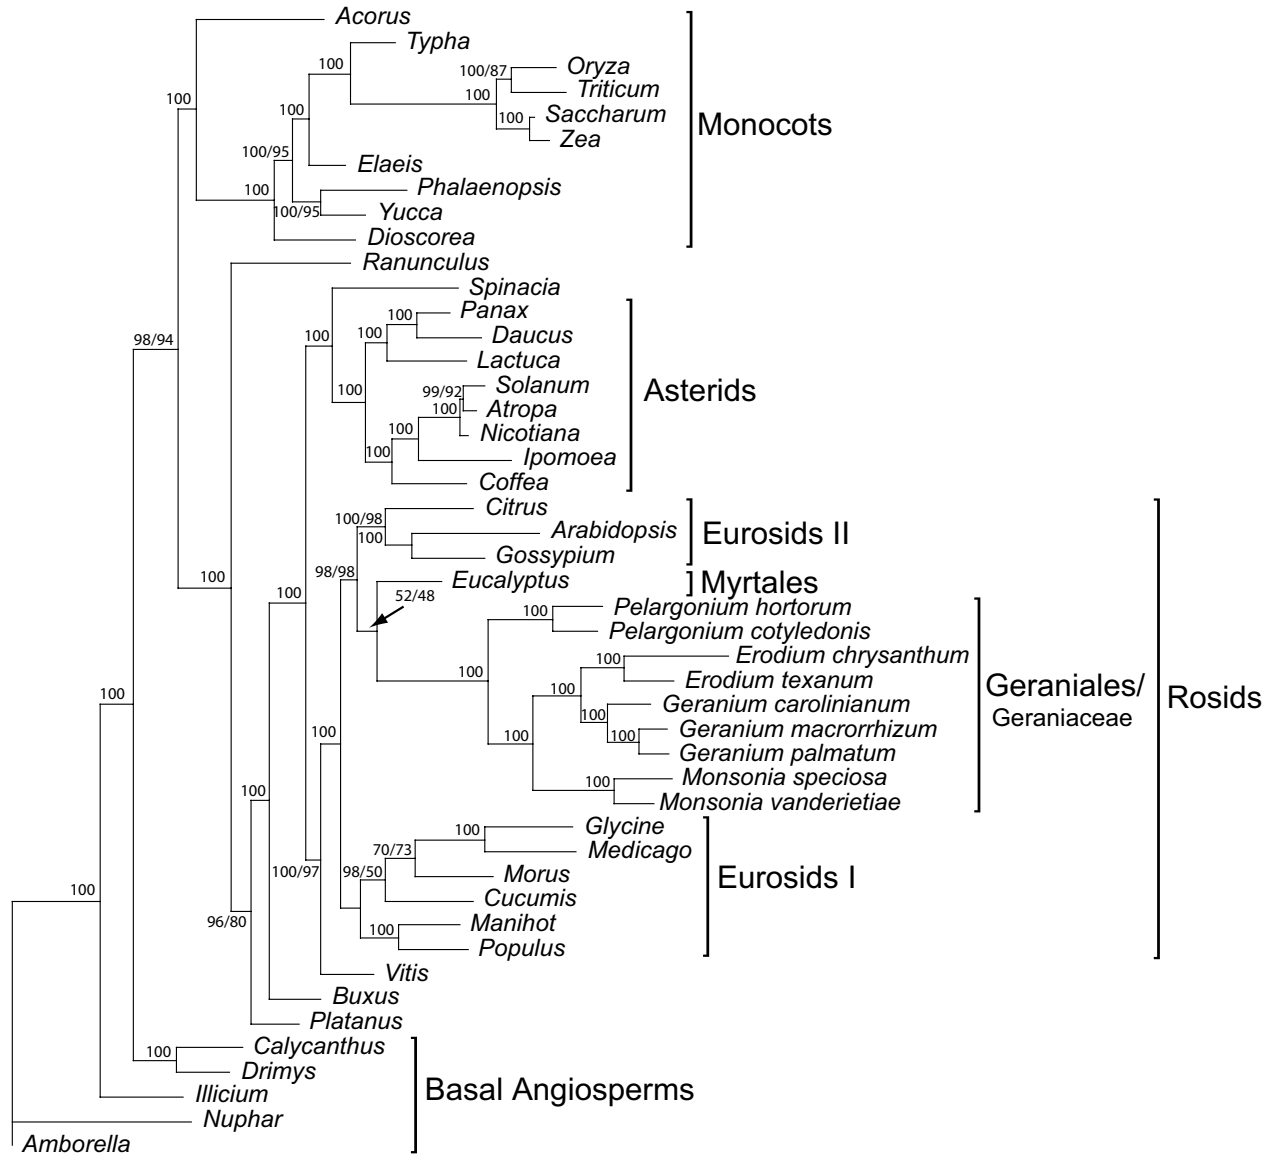

**Fig. S1.** ML tree inferred from 72 genes from 47 taxa ( $-\ln L \mu = 607633.5555$ ,  $\sigma = 0.001$ ). Bootstrap values for ML and MP, respectively, are shown at nodes. When ML and MP values are the same, only one value is reported.

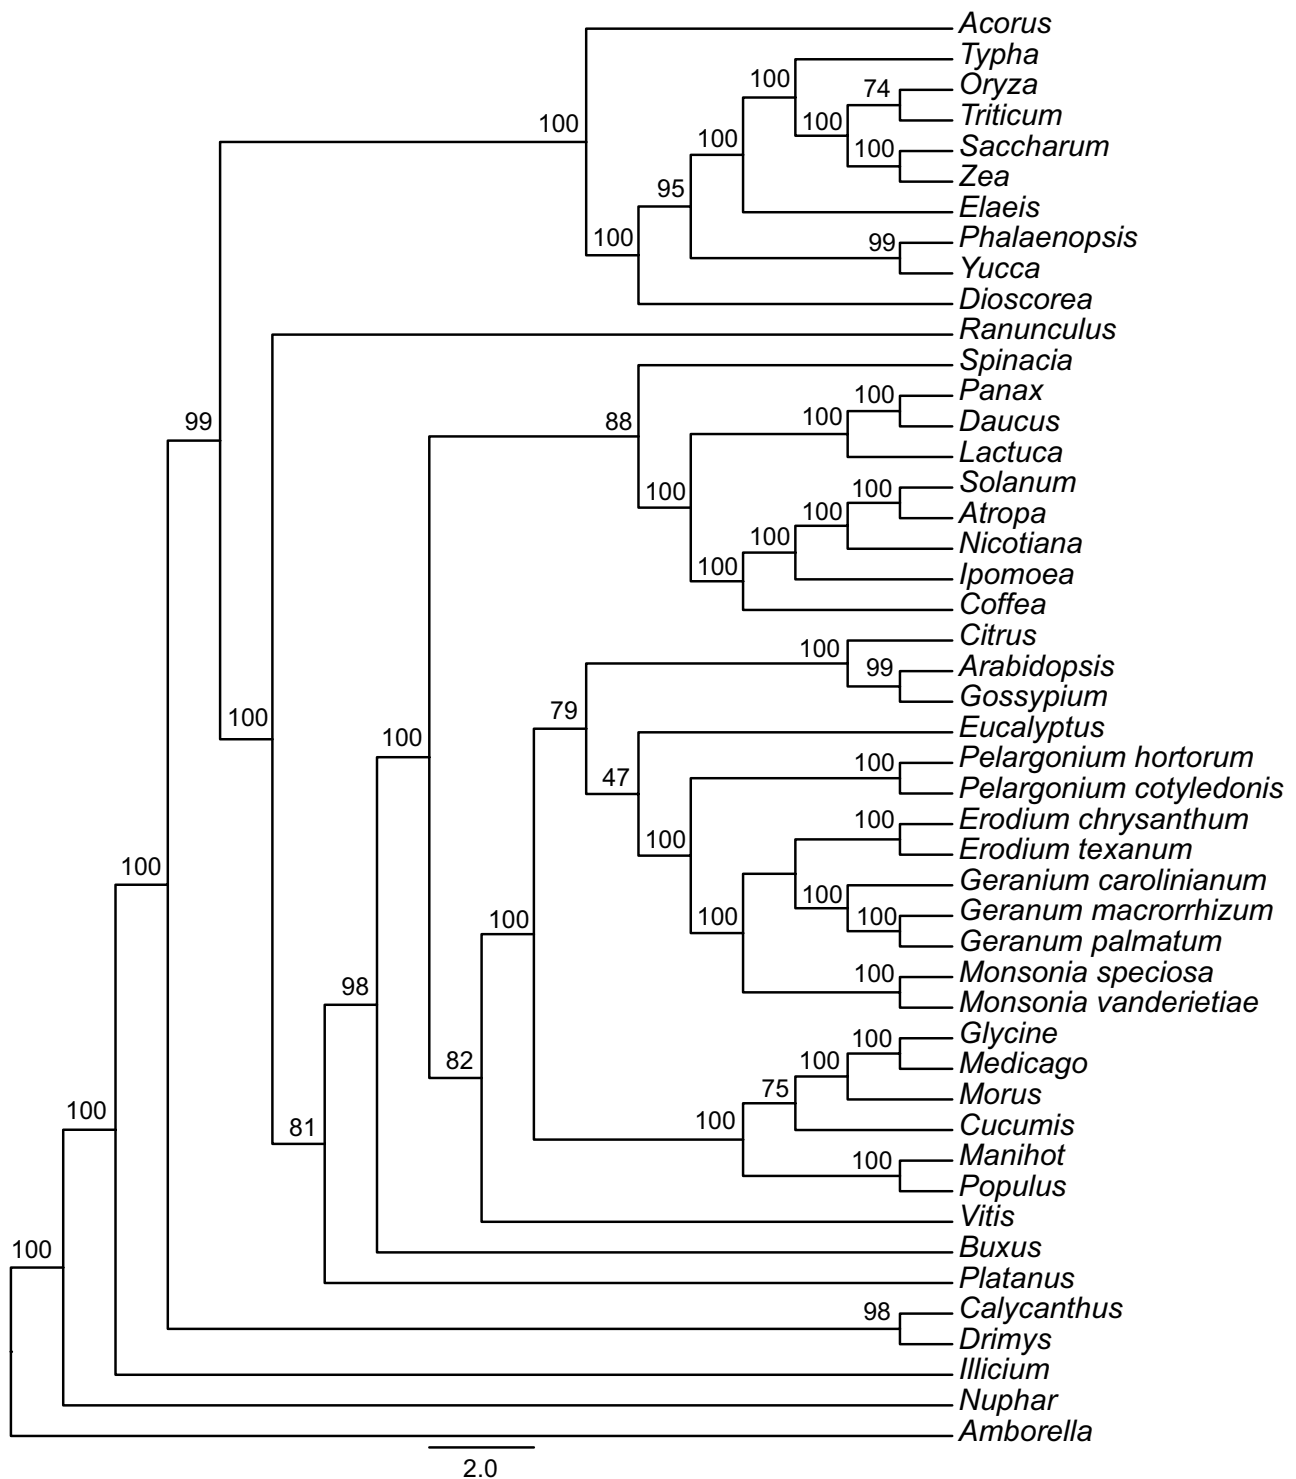

**Fig. S2.** ML tree inferred from 27 slowly evolving genes for 47 taxa ( $-\ln L = 125333.7228$ ). ML bootstrap values are shown at nodes. Genes included *petA*, *petB*, *petD*, *petG*, *petL*, *petN*, *psaA*, *psaB*, *psaC*, *psal*, *psaj*, *psbA*, *psbB*, *psbC*, *psbD*, *psbE*, *psbF*, *psbH*, *psbl*, *psbj*, *psbK*, *psbL*, *psbM*, *psbN*, *psbT*, *psbZ*, and *rbcl* and were chosen based on Wolfe *et al.* (1) and Moore *et al.* (2).

1. Wolfe KH, Li WH, Sharp PM (1987) Rates of nucleotide substitution vary greatly among plant mitochondrial, chloroplast, and nuclear DNAs. *Proc Natl Acad Sci USA* 84:9054–9058.
2. Moore MJ, Bell CD, Soltis PS, Soltis DE (2007) Using plastid genome-scale data to resolve enigmatic relationships among basal angiosperms. *Proc Natl Acad Sci USA* 104:19363–19638.

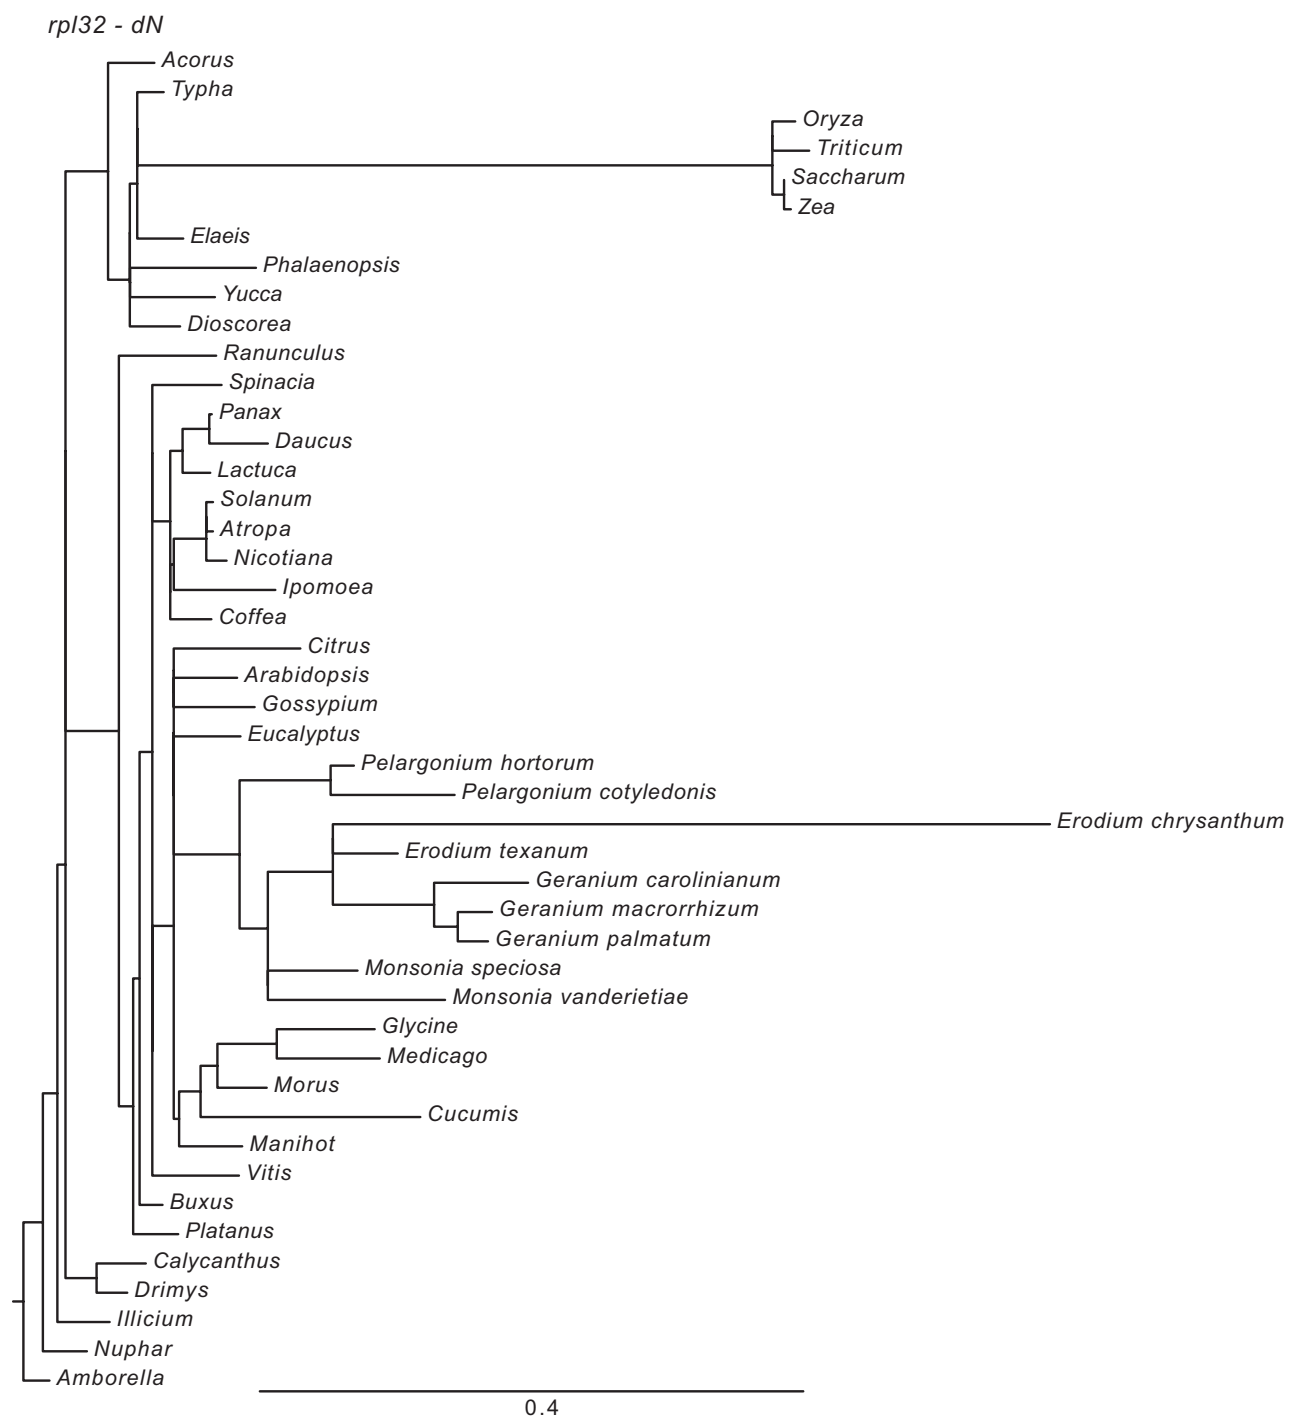

**Fig. S3.** ML trees from codeml of non-synonymous (*dN*) or synonymous (*dS*) substitutions for the genes *rpl32-dN*, *rpl20-dS*, *rps18-dN*, *rps18-dS*, *psa1-dN*, and *psaC-dS*. The same trees shown in Fig. 4, but taxa names are shown here.

rpl20 - dS

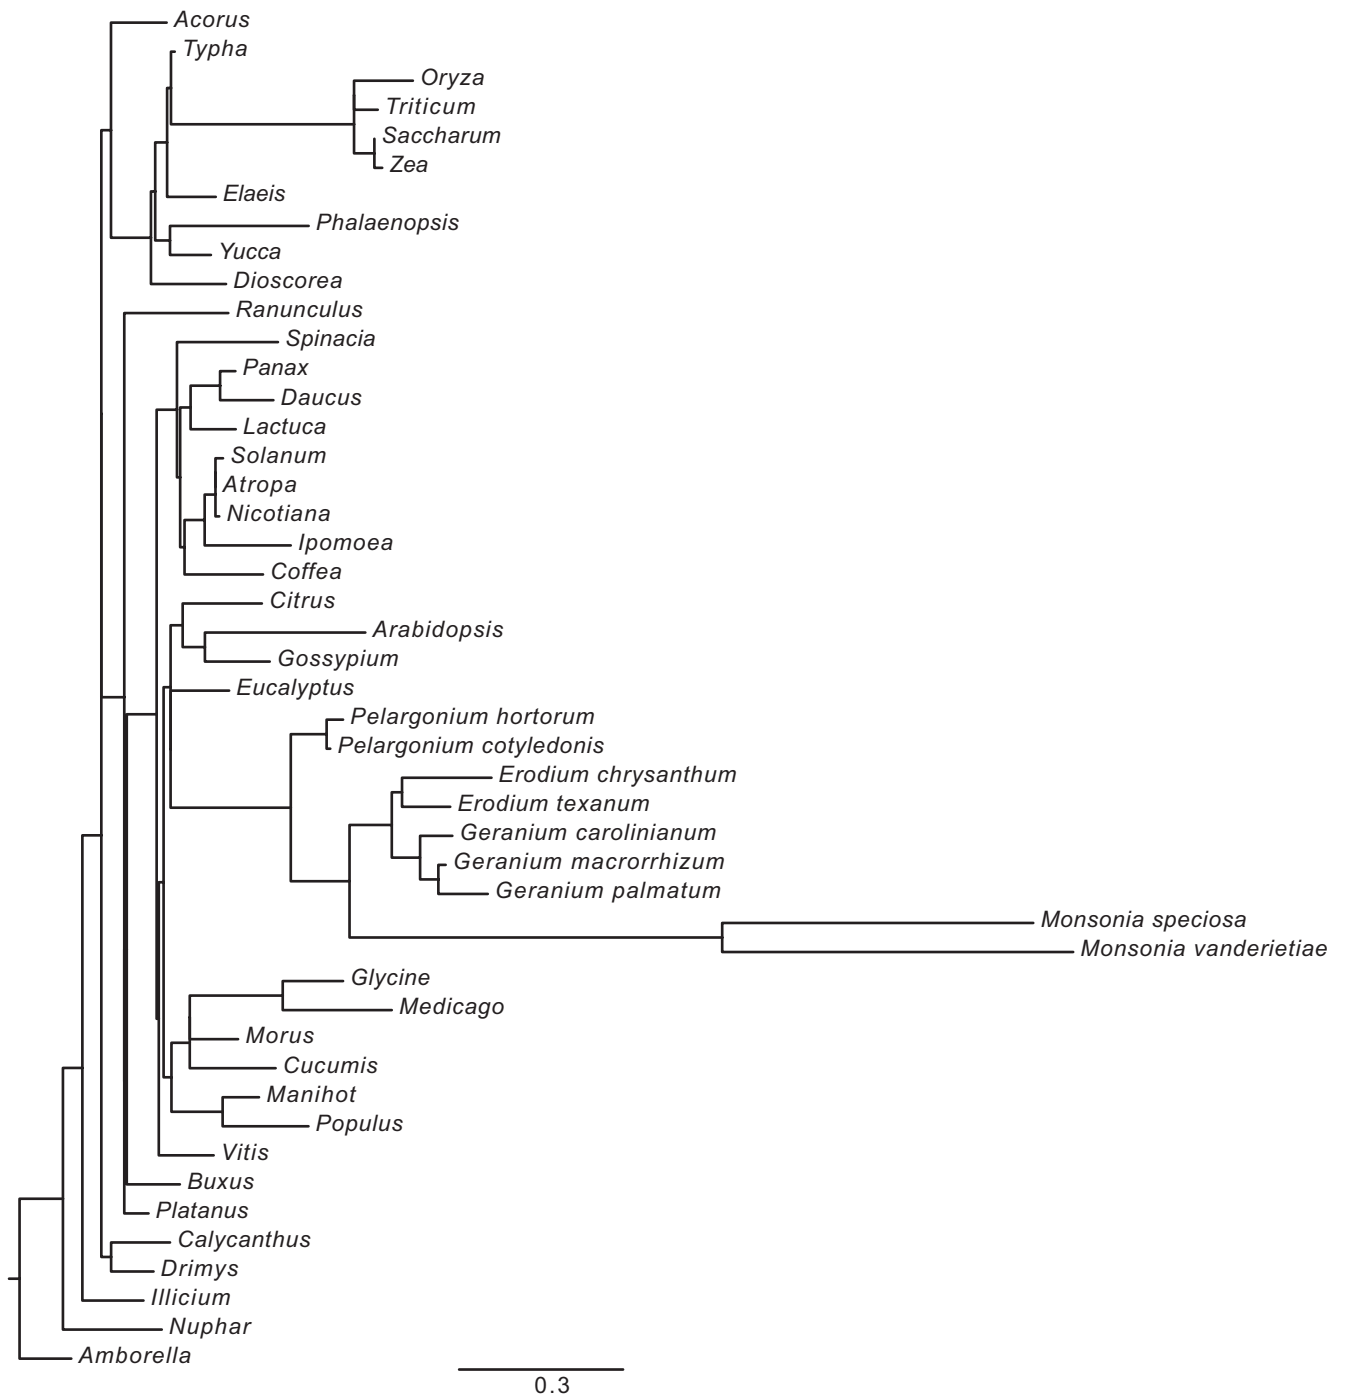

Fig. S3. (continued)

rps18 - dN

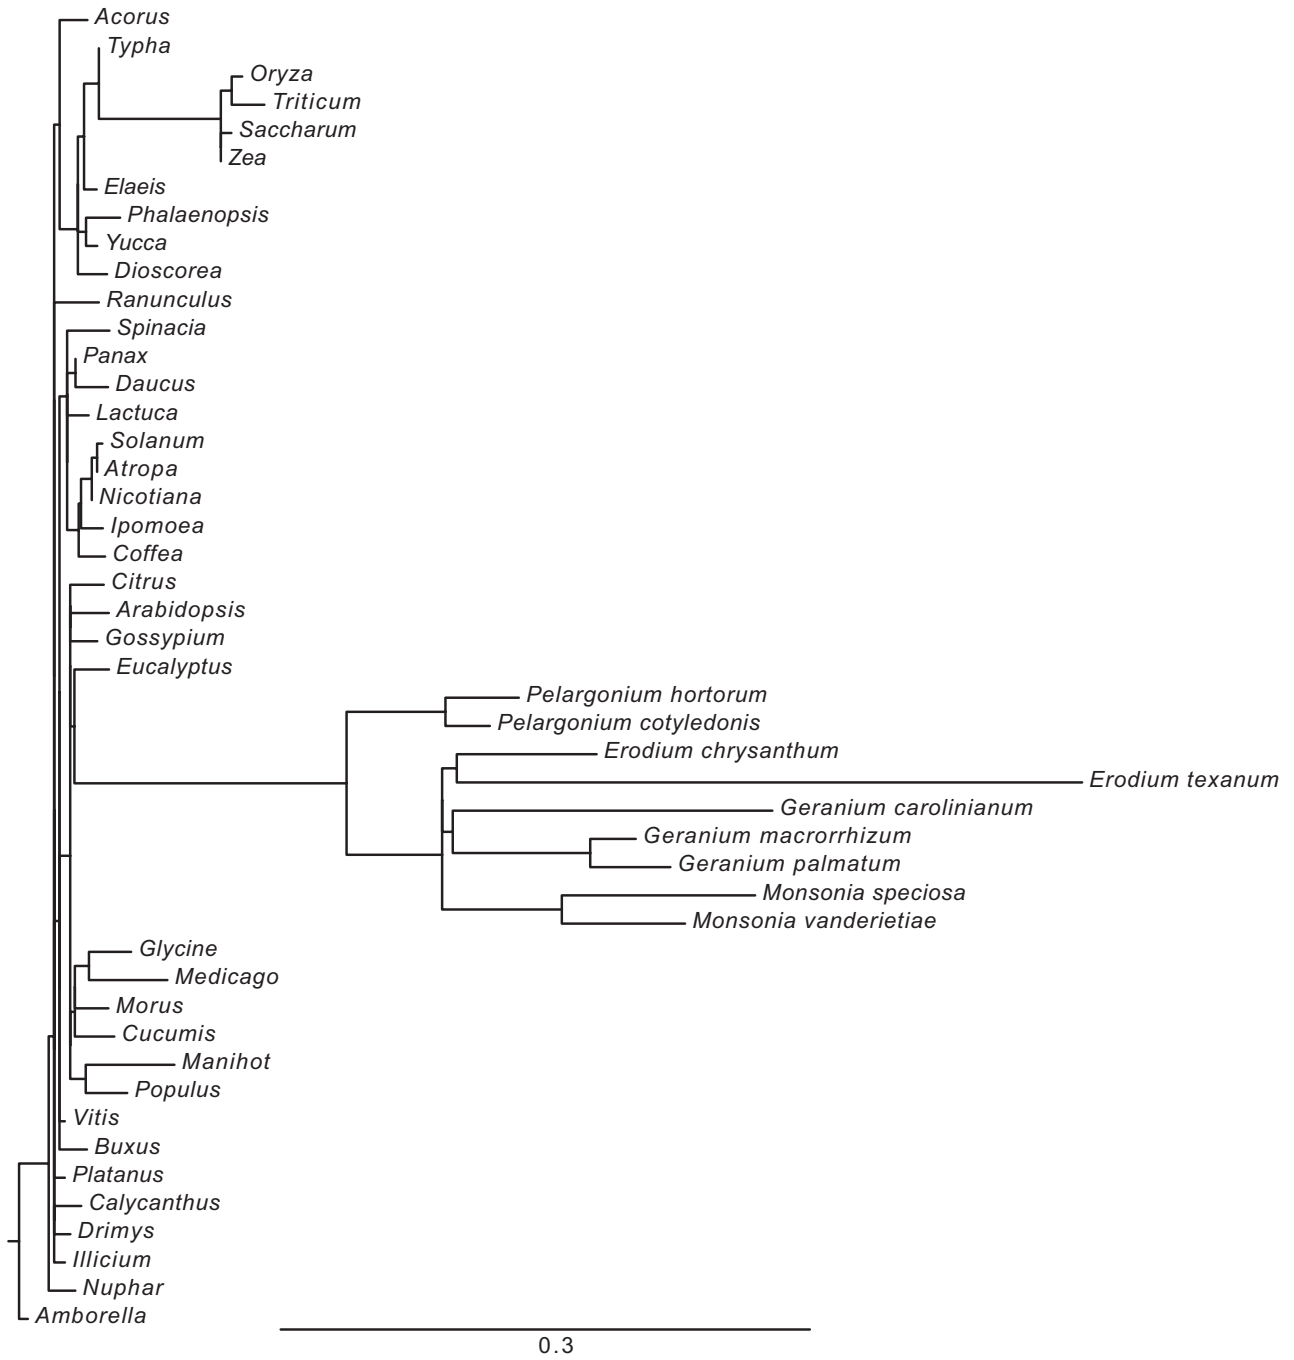

0.3

Fig. S3. (continued)

rps18 - dS

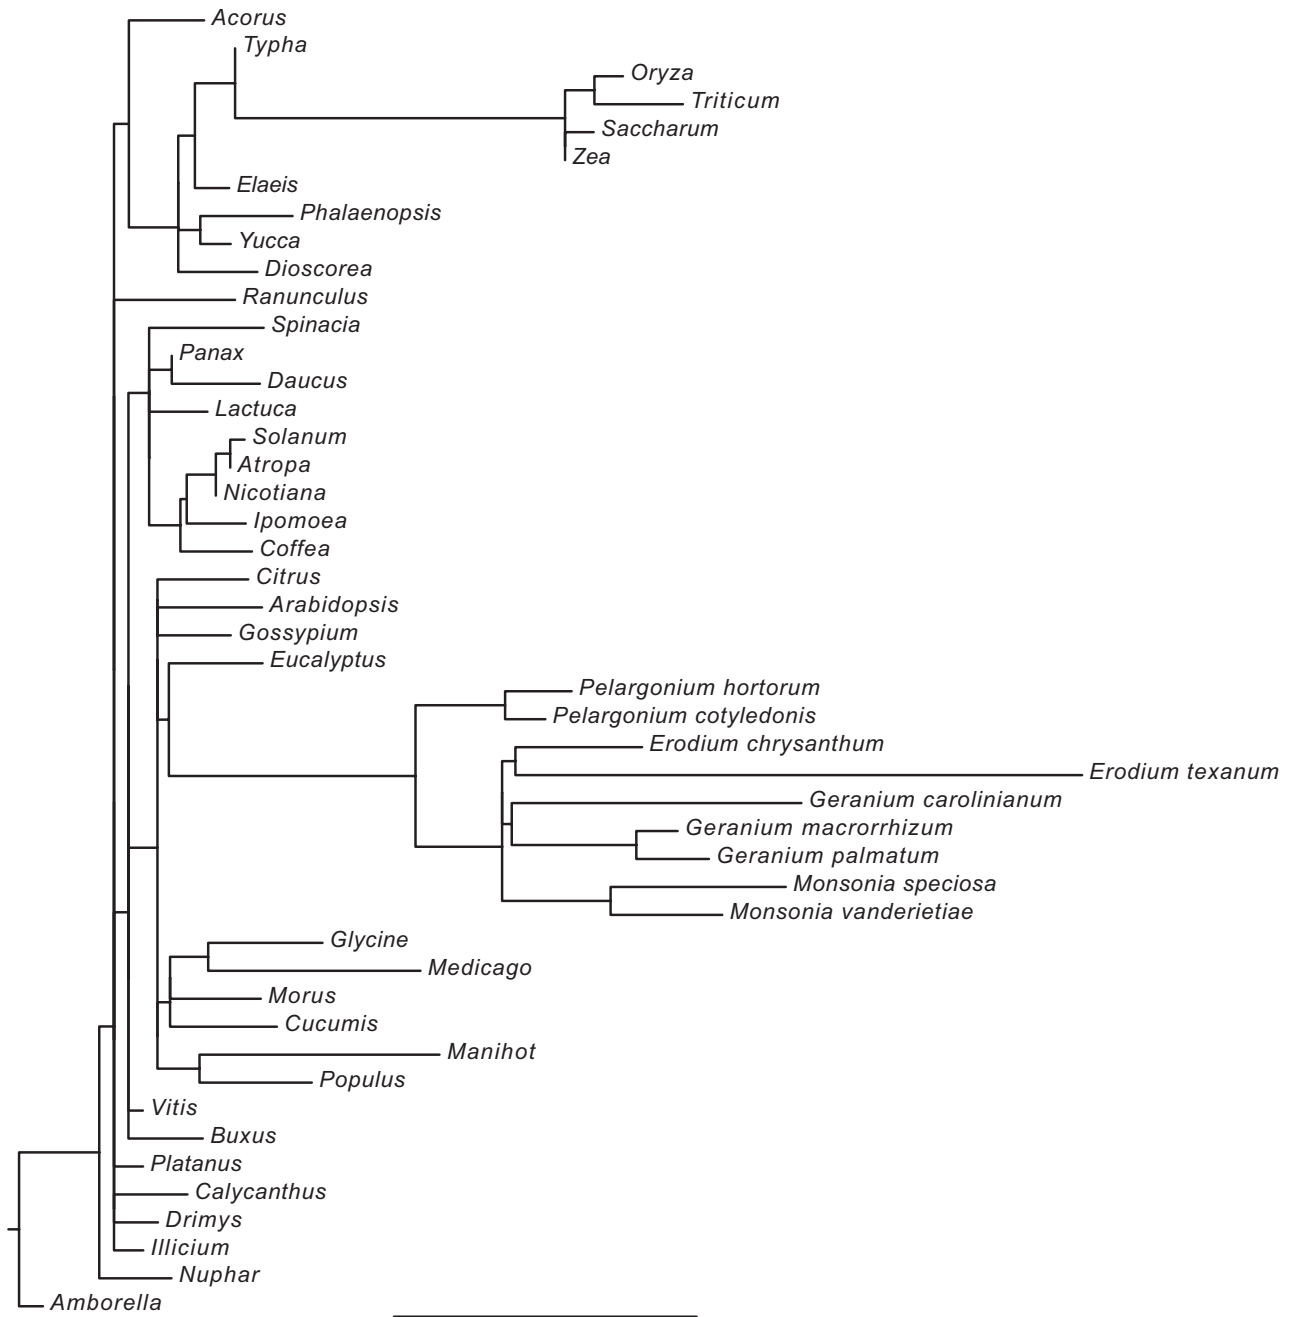

0.3

Fig. S3. (continued)

psal - dN

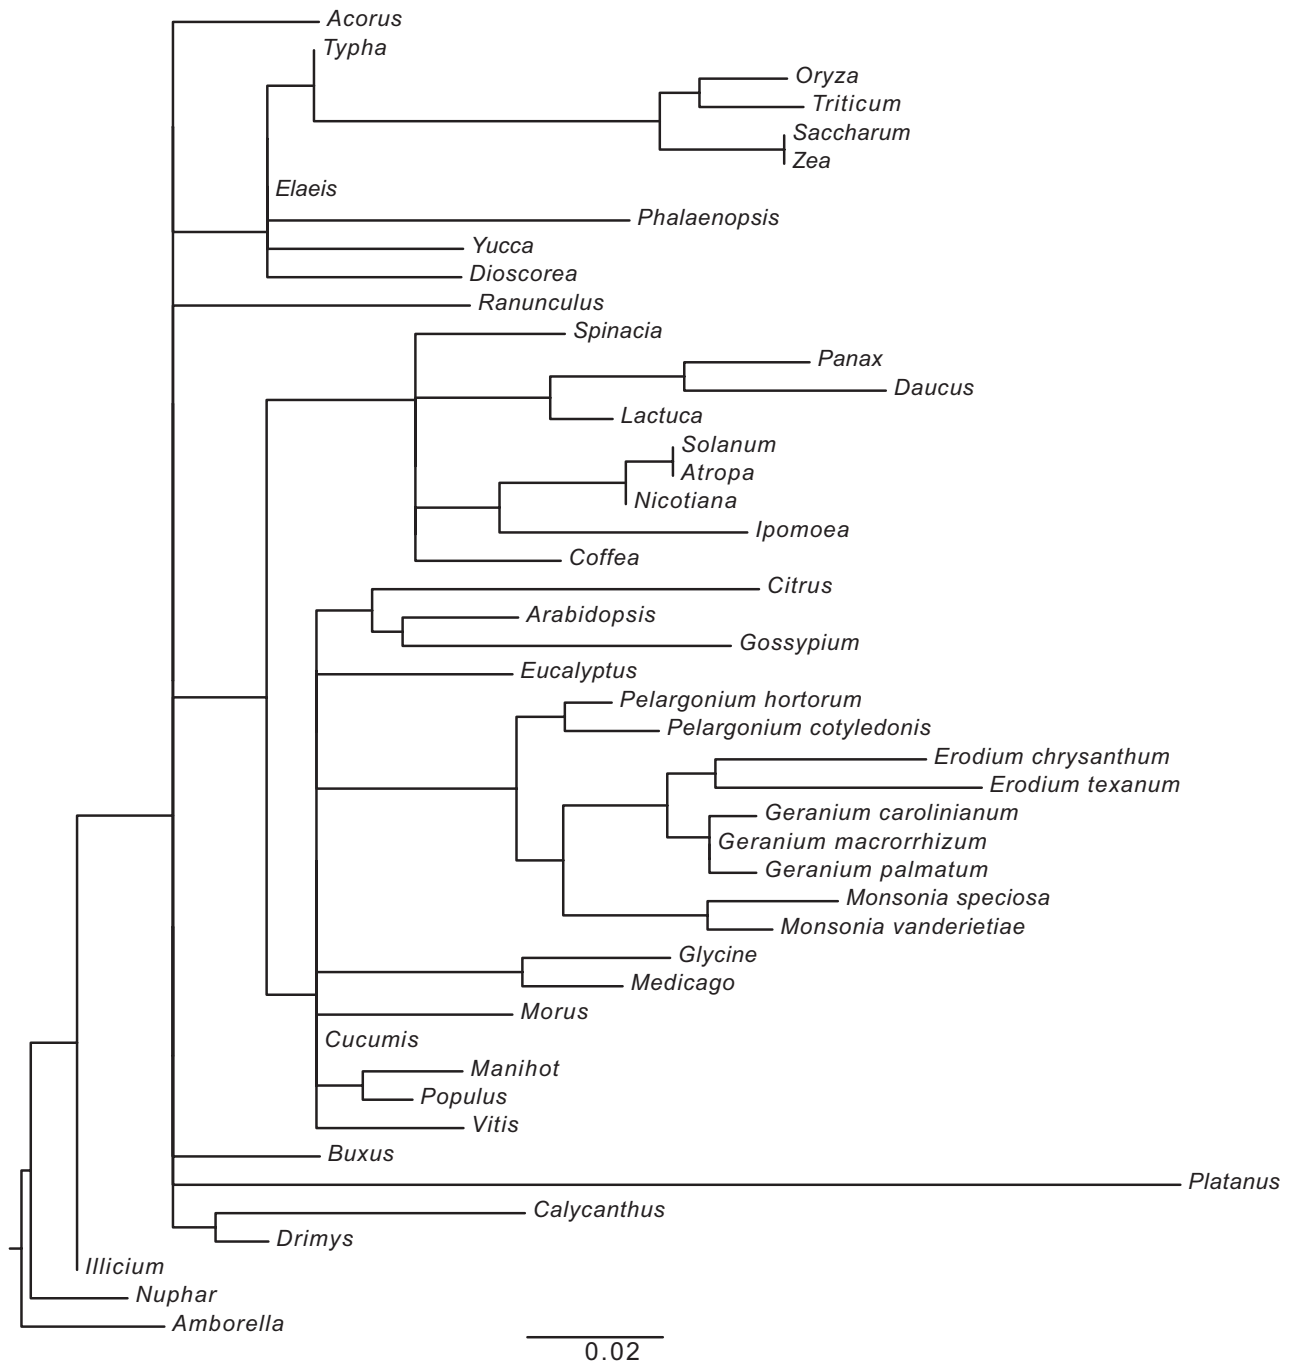

Fig. S3. (continued)

psaC - dS

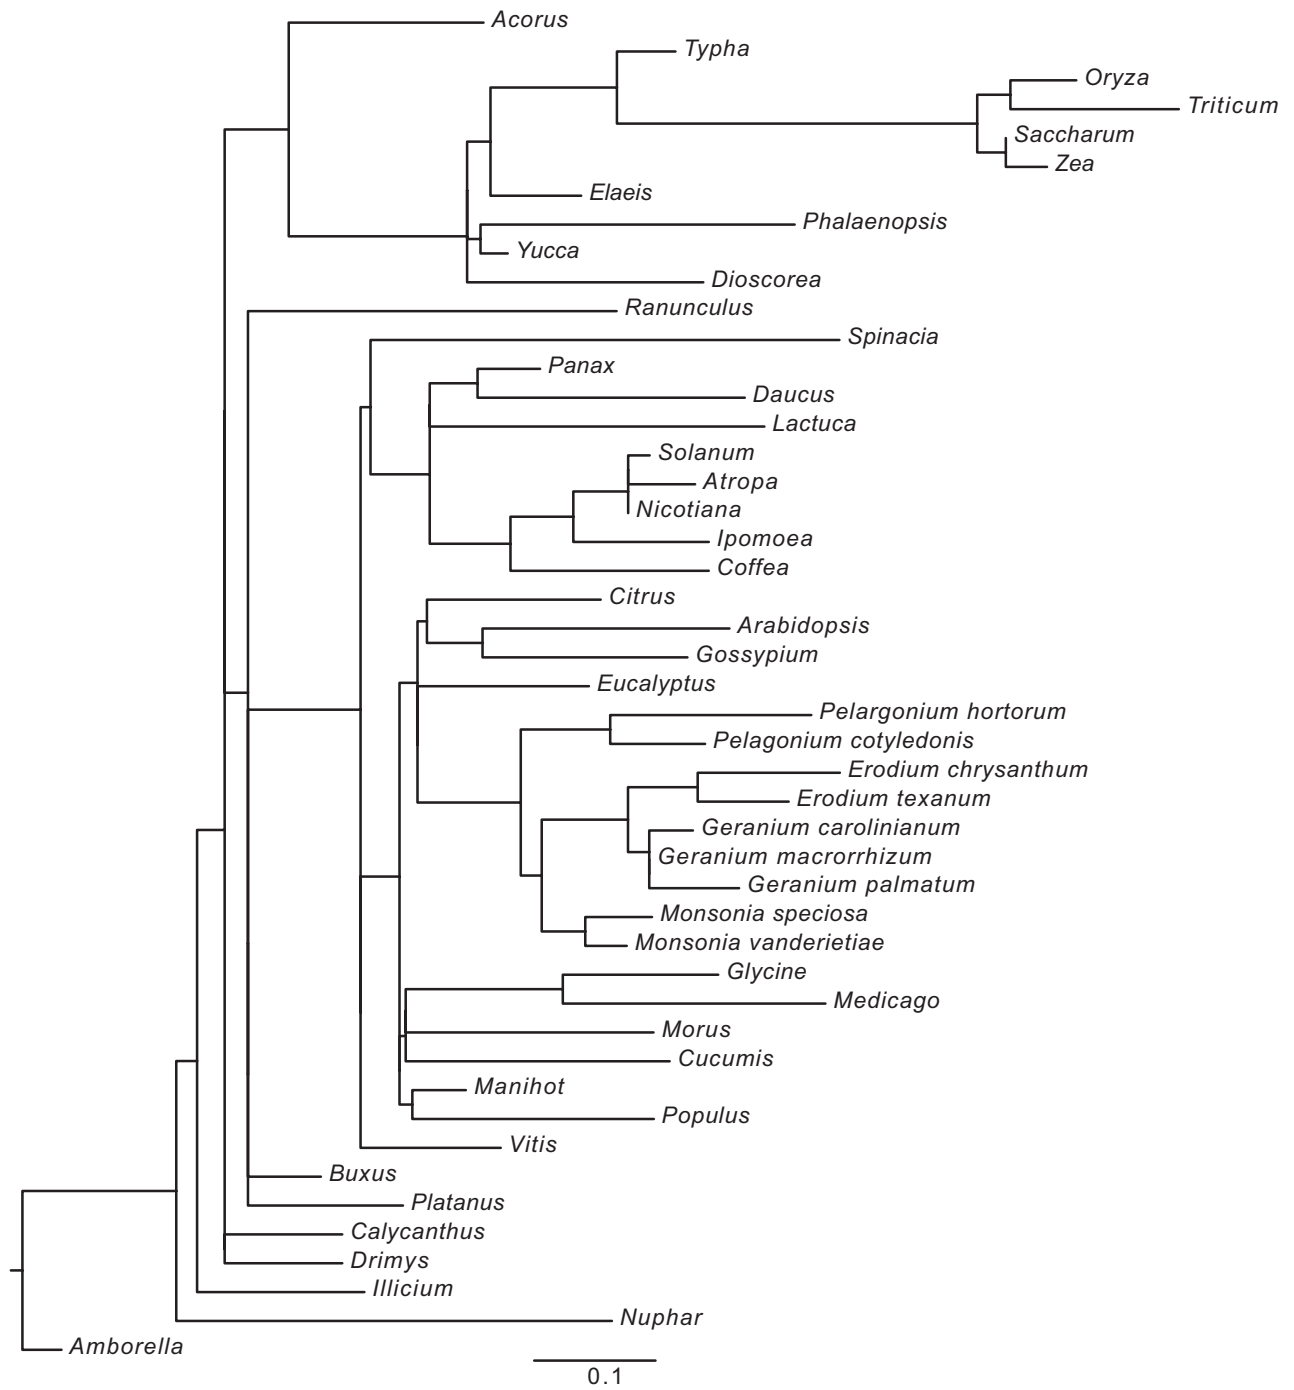

Fig. S3. (continued)





Table S1. Genes sampled for 47 taxa

| Gene name    | Taxa with missing data                              |
|--------------|-----------------------------------------------------|
| <i>atpA</i>  | None                                                |
| <i>atpB</i>  | None                                                |
| <i>atpE</i>  | None                                                |
| <i>atpF</i>  | None                                                |
| <i>atpH</i>  | None                                                |
| <i>atpI</i>  | None                                                |
| <i>ccsA</i>  | None                                                |
| <i>cemA</i>  | None                                                |
| <i>matK</i>  | None                                                |
| <i>ndhA</i>  | <i>Phalaenopsis</i> , <i>E.chrysanthum</i>          |
| <i>ndhB</i>  | <i>Phalaenopsis</i>                                 |
| <i>ndhC</i>  | <i>Phalaenopsis</i> , <i>E.chrysanthum</i>          |
| <i>ndhD</i>  | <i>Phalaenopsis</i> , <i>E.chrysanthum</i>          |
| <i>ndhE</i>  | <i>Phalaenopsis</i> , <i>E.chrysanthum</i>          |
| <i>ndhF</i>  | <i>Phalaenopsis</i>                                 |
| <i>ndhG</i>  | <i>Phalaenopsis</i> , <i>E.chrysanthum</i>          |
| <i>ndhH</i>  | <i>Phalaenopsis</i> , <i>E.chrysanthum</i>          |
| <i>ndhI</i>  | <i>Phalaenopsis</i> , <i>E.chrysanthum</i>          |
| <i>ndhJ</i>  | <i>Phalaenopsis</i> , <i>E.chrysanthum</i>          |
| <i>ndhK</i>  | <i>Phalaenopsis</i> , <i>E.chrysanthum</i>          |
| <i>petA</i>  | None                                                |
| <i>petB</i>  | None                                                |
| <i>petD</i>  | None                                                |
| <i>petG</i>  | None                                                |
| <i>petL</i>  | None                                                |
| <i>petN</i>  | None                                                |
| <i>psaA</i>  | None                                                |
| <i>psaB</i>  | None                                                |
| <i>psaC</i>  | None                                                |
| <i>psaI</i>  | None                                                |
| <i>psaJ</i>  | None                                                |
| <i>psbA</i>  | None                                                |
| <i>psbB</i>  | None                                                |
| <i>psbC</i>  | None                                                |
| <i>psbD</i>  | <i>G.carolinianum</i>                               |
| <i>psbE</i>  | None                                                |
| <i>psbF</i>  | None                                                |
| <i>psbH</i>  | None                                                |
| <i>psbI</i>  | None                                                |
| <i>psbJ</i>  | None                                                |
| <i>psbK</i>  | None                                                |
| <i>psbL</i>  | None                                                |
| <i>psbM</i>  | None                                                |
| <i>psbN</i>  | None                                                |
| <i>psbT</i>  | None                                                |
| <i>psbZ</i>  | None                                                |
| <i>rbcL</i>  | None                                                |
| <i>rpl14</i> | None                                                |
| <i>rpl16</i> | None                                                |
| <i>rpl2</i>  | None                                                |
| <i>rpl20</i> | None                                                |
| <i>rpl22</i> | <i>Glycine</i> , <i>Gossypium</i> , <i>Medicago</i> |
| <i>rpl23</i> | <i>Spinacia</i>                                     |
| <i>rpl32</i> | <i>Populus</i>                                      |
| <i>rpl33</i> | None                                                |
| <i>rpl36</i> | None                                                |
| <i>rpoA</i>  | <i>P.hortorum</i> , <i>P.cotyleonis</i>             |
| <i>rpoB</i>  | None                                                |
| <i>rpoC1</i> | None                                                |
| <i>rpoC2</i> | None                                                |
| <i>rps11</i> | None                                                |
| <i>rps12</i> | None                                                |
| <i>rps14</i> | None                                                |
| <i>rps15</i> | None                                                |

| Gene name    | Taxa with missing data                              |
|--------------|-----------------------------------------------------|
| <i>rps16</i> | <i>Dioscorea</i> , <i>Medicago</i> , <i>Populus</i> |
| <i>rps18</i> | None                                                |
| <i>rps19</i> | None                                                |
| <i>rps2</i>  | None                                                |
| <i>rps3</i>  | None                                                |
| <i>rps4</i>  | None                                                |
| <i>rps7</i>  | None                                                |
| <i>rps8</i>  | None                                                |

*E.chrysanthum* = *Erodium chrysanthum*, *G.carolinianum* = *Geranium carolinianum*, *P.hortorum* = *Pelargonium X hortorum*, *P.cotyledonis* = *Pelargonium cotyledonis*. Missing data and gene exclusions are described. Two genes, *clpP* and *infA*, were excluded, because we were unable to align either amino acid or nucleotide sequences. Additionally, some genes are missing from various genomes. The majority of the NADH dehydrogenase genes (*ndhA*, *ndhC*, *ndhD*, *ndhE*, *ndhG*, *ndhH*, *ndhI*, *ndhJ*, and *ndhK*) are missing in *E. chrysanthum*. Incomplete genome sequences result in missing data for *psbD* in *G. carolinianum* and 24 nucleotides of *rbcL* in *E. chrysanthum*. In addition, a functional copy of the RNA polymerase gene *rpoA* is missing in *P. cotyledonis* (M. Guisinger, unpublished) and *P. hortorum* (1). Previously published intron losses that were either confirmed in our study or found in additional taxa included the loss of the introns in *rpl16* and *rps16* in all Geraniaceae (1, 2) and in *rpl2* in *Monsonia speciosa* and *M. vanderietiae* (previously *Sarcocaulon vanderietiae*) (3). The loss of the *rpoC1* intron in *E. chrysanthum* has not been previously described. Genes that contain internal stop codons, and are therefore shortened in the alignment, include *atpE* in *Monsonia speciosa* and *M. vanderietiae*, *ndhB* and *ndhF* in *E. chrysanthum*, *rpl22* in *G. palmatum*, *rpl23* in *G. palmatum* and *G. macrorrhizum*, *rpoB* in *G. macrorrhizum*, and *rpoC1* in *G. carolinianum*.

1. Chumley TW, Palmer JD, Mower JP, Fourcade HM, Calie PJ et al. (2006) The complete chloroplast genome sequence of *Pelargonium x hortorum*: organization and evolution of the largest and most highly rearranged chloroplast genome of land plants. *Mol Biol Evol* 23:2175–90.
2. Campagna ML, Downie SR (1998) The intron in chloroplast gene *rpl16* is missing from the flowering plant families Geraniaceae, Goodeniaceae, and Plumbaginaceae. *Trans Ill State Acad Sci* 91:1–11.
3. Downie SR, Olmstead RG, Zurawski G, Soltis DE, Soltis PS et al. (1991) Six independent losses of the chloroplast DNA *rpl2* intron in dicotyledons: molecular and phylogenetic implications. *Evolution* 45:1245–1259.

Table S2. GenBank accession numbers for 47 taxa included in analyses

| Taxon                          | GenBank accession numbers            |
|--------------------------------|--------------------------------------|
| <i>Acorus americanus</i>       | NC_010093                            |
| <i>Amborella trichopoda</i>    | NC_005086                            |
| <i>Arabidopsis thaliana</i>    | NC_000932                            |
| <i>Atropa belladonna</i>       | NC_004561                            |
| <i>Buxus microphylla</i>       | NC_009599                            |
| <i>Calycanthus floridus</i>    | NC_004993                            |
| <i>Citrus sinensis</i>         | NC_008334                            |
| <i>Coffea arabica</i>          | NC_008535                            |
| <i>Cucumis sativus</i>         | NC_007144                            |
| <i>Daucus carota</i>           | NC_008325                            |
| <i>Dioscorea elephantipes</i>  | NC_009601                            |
| <i>Drimys granadensis</i>      | NC_008456                            |
| <i>Elaeis oleifera</i>         | EU016883-EU016962                    |
| <i>Erodium chrysanthum</i>     | EU922029-EU922091                    |
| <i>Erodium texanum</i>         | EU922092-EU922163                    |
| <i>Eucalyptus globulus</i>     | NC_008115                            |
| <i>Geranium carolinianum</i>   | EU922164-EU922234                    |
| <i>Geranium macrorrhizum</i>   | EU922235-EU922306                    |
| <i>Geranium palmatum</i>       | EU922307-EU922378                    |
| <i>Glycine max</i>             | NC_007942                            |
| <i>Gossypium hirsutum</i>      | NC_007944                            |
| <i>Illicium oligandrum</i>     | NC_009600                            |
| <i>Ipomoea purpurea</i>        | NC_009808                            |
| <i>Lactuca sativa</i>          | NC_007578                            |
| <i>Manihot esculenta</i>       | NC_010433                            |
| <i>Medicago truncatula</i>     | NC_003119                            |
| <i>Monsonia speciosa</i>       | EU922379-EU922450                    |
| <i>Monsonia vanderietiae</i>   | EU922451-EU922522                    |
| <i>Morus indica</i>            | NC_008359                            |
| <i>Nicotiana tabacum</i>       | NC_001879                            |
| <i>Nuphar advena</i>           | NC_008788                            |
| <i>Oryza sativa</i>            | NC_001320                            |
| <i>Panax schinseng</i>         | NC_006290                            |
| <i>Pelargonium cotyledonis</i> | EU922523-EU922593                    |
| <i>Pelargonium X hortorum</i>  | NC_008454                            |
| <i>Phalaenopsis aphrodite</i>  | NC_007499                            |
| <i>Platanus occidentalis</i>   | NC_008335                            |
| <i>Populus trichocarpa</i>     | NC_008235                            |
| <i>Ranunculus macranthus</i>   | NC_008796                            |
| <i>Saccharum officinarum</i>   | NC_006084                            |
| <i>Solanum tuberosum</i>       | NC_008096                            |
| <i>Spinacia oleracea</i>       | NC_002202                            |
| <i>Triticum aestivum</i>       | NC_002762                            |
| <i>Typha latifolia</i>         | DQ069337-DQ069702, EU017296-EU017315 |
| <i>Vitis vinifera</i>          | NC_007957                            |
| <i>Yucca schidigera</i>        | DQ069337-DQ069702, EU016681-EU016700 |
| <i>Zea mays</i>                | NC_001666                            |

**Table S3. Status of Geraniaceae plastid genome sequencing**

| Species name                   | No. of contigs | Largest contig, bp | IR information (PCR confirmation needed) |
|--------------------------------|----------------|--------------------|------------------------------------------|
| <i>Erodium texanum</i>         | 1              | 131,840            | ~ 125 bp                                 |
| <i>Erodium chrysanthum</i>     | 8              | 37,800             | unknown                                  |
| <i>Geranium carolinianum</i>   | 10             | 56,075             | unknown                                  |
| <i>Geranium macrorrhizum</i>   | 4              | 70,351             | unknown                                  |
| <i>Geranium palmatum</i>       | 1              | 137,094            | ~ 8,300 bp                               |
| <i>Monsonia speciosa</i>       | 1              | 125,022            | ~ 5,640 bp                               |
| <i>Monsonia vanderietiae</i>   | 8              | 53,711             | unknown                                  |
| <i>Pelargonium cotyledonis</i> | 2              | 81,829             | unknown                                  |

**Table S4. Pair-wise Wilcoxon rank sum tests for values of *dN* across gene groups within Geraniaceae (see *Materials and Methods* for grouping of genes)**

| <i>dN</i><br>Gene(s) | Individual gene or gene group |                    |                    |                    |                    |                    |                    |                    |                    |                    |            |
|----------------------|-------------------------------|--------------------|--------------------|--------------------|--------------------|--------------------|--------------------|--------------------|--------------------|--------------------|------------|
|                      | <i>atp</i>                    | <i>ccsA</i>        | <i>cemA</i>        | <i>matK</i>        | <i>ndh</i>         | <i>pet</i>         | <i>psa</i>         | <i>psb</i>         | <i>rbcL</i>        | <i>rpl</i>         | <i>rpo</i> |
| <i>ccsA</i>          | 0.0034                        | -                  | -                  | -                  | -                  | -                  | -                  | -                  | -                  | -                  | -          |
| <i>cemA</i>          | <b>&lt; 0.0001</b>            | <b>0.0001</b>      | -                  | -                  | -                  | -                  | -                  | -                  | -                  | -                  | -          |
| <i>matK</i>          | 0.0010                        | 1.0000             | 0.0041             | -                  | -                  | -                  | -                  | -                  | -                  | -                  | -          |
| <i>ndh</i>           | 1.0000                        | 0.0011             | <b>&lt; 0.0001</b> | <b>0.0003</b>      | -                  | -                  | -                  | -                  | -                  | -                  | -          |
| <i>pet</i>           | 0.0062                        | <b>&lt; 0.0001</b> | <b>&lt; 0.0001</b> | <b>&lt; 0.0001</b> | <b>0.0002</b>      | -                  | -                  | -                  | -                  | -                  | -          |
| <i>psa</i>           | <b>&lt; 0.0001</b>            | <b>&lt; 0.0001</b> | <b>&lt; 0.0001</b> | <b>&lt; 0.0001</b> | <b>&lt; 0.0001</b> | 1.0000             | -                  | -                  | -                  | -                  | -          |
| <i>psb</i>           | <b>&lt; 0.0001</b>            | <b>&lt; 0.0001</b> | <b>&lt; 0.0001</b> | <b>&lt; 0.0001</b> | <b>&lt; 0.0001</b> | 0.0013             | 0.4091             | -                  | -                  | -                  | -          |
| <i>rbcL</i>          | <b>0.0002</b>                 | <b>0.0001</b>      | <b>&lt; 0.0001</b> | <b>&lt; 0.0001</b> | <b>0.0002</b>      | 1.0000             | 1.0000             | 1.0000             | -                  | -                  | -          |
| <i>rpl</i>           | <b>&lt; 0.0001</b>            | 1.0000             | 0.0012             | 1.0000             | <b>&lt; 0.0001</b> | -          |
| <i>rpo</i>           | <b>&lt; 0.0001</b>            | 1.0000             | 0.0009             | 1.0000             | <b>&lt; 0.0001</b> | 1.0000             | -          |
| <i>rps</i>           | <b>&lt; 0.0001</b>            | 1.0000             | 0.0085             | 1.0000             | <b>&lt; 0.0001</b> | 0.1979             | 1.0000     |

Bold cells show *P*-values significant after Bonferroni correction ( $\alpha = 0.05$ ).

Table S5. Pair-wise Wilcoxon rank sum tests for values of *dS* across gene groups within Geraniaceae (see Materials and Methods for grouping of genes)

| <i>dS</i><br>Gene(s) | Individual gene or gene group |             |             |             |            |            |            |                    |             |            |            |
|----------------------|-------------------------------|-------------|-------------|-------------|------------|------------|------------|--------------------|-------------|------------|------------|
|                      | <i>atp</i>                    | <i>ccsA</i> | <i>cemA</i> | <i>matK</i> | <i>ndh</i> | <i>pet</i> | <i>psa</i> | <i>psb</i>         | <i>rbcL</i> | <i>rpl</i> | <i>rpo</i> |
| <i>ccsA</i>          | 0.4120                        | -           | -           | -           | -          | -          | -          | -                  | -           | -          | -          |
| <i>cemA</i>          | 1.0000                        | 1.0000      | -           | -           | -          | -          | -          | -                  | -           | -          | -          |
| <i>matK</i>          | 1.0000                        | 1.0000      | 1.0000      | -           | -          | -          | -          | -                  | -           | -          | -          |
| <i>ndh</i>           | 1.0000                        | 0.1311      | 1.0000      | 1.0000      | -          | -          | -          | -                  | -           | -          | -          |
| <i>pet</i>           | 1.0000                        | 0.0698      | 1.0000      | 0.9165      | 1.0000     | -          | -          | -                  | -           | -          | -          |
| <i>psa</i>           | 1.0000                        | 0.3760      | 1.0000      | 1.0000      | 1.0000     | 1.0000     | -          | -                  | -           | -          | -          |
| <i>psb</i>           | 1.0000                        | 0.0417      | 0.9244      | 0.6271      | 1.0000     | 1.0000     | 1.0000     | -                  | -           | -          | -          |
| <i>rbcL</i>          | 1.0000                        | 1.0000      | 1.0000      | 1.0000      | 1.0000     | 1.0000     | 1.0000     | 1.0000             | -           | -          | -          |
| <i>rpl</i>           | 0.8840                        | 1.0000      | 1.0000      | 1.0000      | 0.0283     | 0.0109     | 0.4348     | <b>&lt; 0.0001</b> | 1.0000      | -          | -          |
| <i>rpo</i>           | 1.0000                        | 1.0000      | 1.0000      | 1.0000      | 1.0000     | 0.9881     | 1.0000     | 0.2601             | 1.0000      | 1.0000     | -          |
| <i>rps</i>           | 0.1511                        | 1.0000      | 1.0000      | 1.0000      | 0.0013     | 0.0009     | 0.0531     | <b>&lt; 0.0001</b> | 1.0000      | 1.0000     | 1.0000     |

Bold cells show *P*-values significant after Bonferroni correction ( $\alpha = 0.05$ ).

Table S6. Pair-wise Wilcoxon rank sum tests for values of  $dS$  for branches within Geraniaceae

| $dS$   | Branch         |                |                |                |                |                |                |                |                |                |                |        |                |                |                |        |
|--------|----------------|----------------|----------------|----------------|----------------|----------------|----------------|----------------|----------------|----------------|----------------|--------|----------------|----------------|----------------|--------|
| Branch | 1              | 2              | 3              | 4              | 5              | 6              | 7              | 8              | 9              | 10             | 11             | 12     | 13             | 14             | 15             | 16     |
| 2      | <b>0.0001</b>  | -              | -              | -              | -              | -              | -              | -              | -              | -              | -              | -      | -              | -              | -              | -      |
| 3      | < <b>0.001</b> | 0.0133         | -              | -              | -              | -              | -              | -              | -              | -              | -              | -      | -              | -              | -              | -      |
| 4      | < <b>0.001</b> | 0.0538         | 1.0000         | -              | -              | -              | -              | -              | -              | -              | -              | -      | -              | -              | -              | -      |
| 5      | < <b>0.001</b> | 0.0014         | 1.0000         | 1.0000         | -              | -              | -              | -              | -              | -              | -              | -      | -              | -              | -              | -      |
| 6      | < <b>0.001</b> | < <b>0.001</b> | 1.0000         | 1.0000         | 1.0000         | -              | -              | -              | -              | -              | -              | -      | -              | -              | -              | -      |
| 7      | <b>0.0003</b>  | 1.0000         | 0.0244         | 0.0984         | 0.0046         | < <b>0.001</b> | -              | -              | -              | -              | -              | -      | -              | -              | -              | -      |
| 8      | < <b>0.001</b> | < <b>0.001</b> | 0.2111         | 0.3515         | 0.6520         | 1.0000         | < <b>0.001</b> | -              | -              | -              | -              | -      | -              | -              | -              | -      |
| 9      | < <b>0.001</b> | < <b>0.001</b> | 0.0044         | 0.0191         | 0.0350         | 0.4998         | < <b>0.001</b> | 1.0000         | -              | -              | -              | -      | -              | -              | -              | -      |
| 10     | 1.0000         | < <b>0.001</b> | -              | -              | -      | -              | -              | -              | -      |
| 11     | < <b>0.001</b> | 1.0000         | 0.0812         | 0.3305         | 0.0094         | <b>0.0003</b>  | 1.0000         | < <b>0.001</b> | < <b>0.001</b> | < <b>0.001</b> | -              | -      | -              | -              | -              | -      |
| 12     | < <b>0.001</b> | 0.0148         | 1.0000         | 1.0000         | 1.0000         | 1.0000         | 0.0244         | 0.5356         | 0.0127         | < <b>0.001</b> | 0.0523         | -      | -              | -              | -              | -      |
| 13     | < <b>0.001</b> | < <b>0.001</b> | 0.0017         | 0.0079         | 0.0167         | 0.2613         | < <b>0.001</b> | 1.0000         | 1.0000         | < <b>0.001</b> | < <b>0.001</b> | 0.0056 | -              | -              | -              | -      |
| 14     | < <b>0.001</b> | < <b>0.001</b> | 0.2613         | 0.4517         | 0.8406         | 1.0000         | < <b>0.001</b> | 1.0000         | 1.0000         | < <b>0.001</b> | < <b>0.001</b> | 0.5309 | 1.0000         | -              | -              | -      |
| 15     | < <b>0.001</b> | < <b>0.001</b> | 0.7205         | 0.9713         | 1.0000         | 1.0000         | < <b>0.001</b> | 1.0000         | 1.0000         | < <b>0.001</b> | < <b>0.001</b> | 1.0000 | 0.7205         | 1.0000         | -              | -      |
| 16     | < <b>0.001</b> | 1.0000         | 1.0000         | 1.0000         | 0.4517         | 0.0094         | 1.0000         | < <b>0.001</b> | < <b>0.001</b> | < <b>0.001</b> | 1.0000         | 0.7921 | < <b>0.001</b> | < <b>0.001</b> | < <b>0.001</b> | -      |
| 17     | < <b>0.001</b> | <b>0.0003</b>  | 1.0000         | 1.0000         | 1.0000         | 1.0000         | 0.0015         | 1.0000         | 0.5356         | < <b>0.001</b> | 0.0026         | 1.0000 | 0.2672         | 1.0000         | 1.0000         | 0.0147 |

Branch labels are found in Fig. S3a. Bold cells show  $P$ -values significant after Bonferroni correction ( $\alpha = 0.05$ ).

Table S7. Pair-wise Wilcoxon rank sum tests for values of  $dN$  for branches within Geraniaceae

| $dN$   | Branch            |               |               |               |                   |                   |        |                   |                   |                   |        |        |        |        |        |        |
|--------|-------------------|---------------|---------------|---------------|-------------------|-------------------|--------|-------------------|-------------------|-------------------|--------|--------|--------|--------|--------|--------|
| Branch | 1                 | 2             | 3             | 4             | 5                 | 6                 | 7      | 8                 | 9                 | 10                | 11     | 12     | 13     | 14     | 15     | 16     |
| 2      | 1.0000            | -             | -             | -             | -                 | -                 | -      | -                 | -                 | -                 | -      | -      | -      | -      | -      | -      |
| 3      | 0.0004            | 1.0000        | -             | -             | -                 | -                 | -      | -                 | -                 | -                 | -      | -      | -      | -      | -      | -      |
| 4      | 0.0024            | 1.0000        | 1.0000        | -             | -                 | -                 | -      | -                 | -                 | -                 | -      | -      | -      | -      | -      | -      |
| 5      | <b>0.0001</b>     | 0.4998        | 1.0000        | 1.0000        | -                 | -                 | -      | -                 | -                 | -                 | -      | -      | -      | -      | -      | -      |
| 6      | <b>&lt;0.0001</b> | 0.0568        | 1.0000        | 1.0000        | 1.0000            | -                 | -      | -                 | -                 | -                 | -      | -      | -      | -      | -      | -      |
| 7      | 1.0000            | 1.0000        | 1.0000        | 1.0000        | 1.0000            | 0.1143            | -      | -                 | -                 | -                 | -      | -      | -      | -      | -      | -      |
| 8      | <b>&lt;0.0001</b> | 0.0106        | 1.0000        | 1.0000        | 1.0000            | 1.0000            | 0.0279 | -                 | -                 | -                 | -      | -      | -      | -      | -      | -      |
| 9      | <b>&lt;0.0001</b> | 0.0005        | 0.1553        | 1.0000        | 1.0000            | 1.0000            | 0.0017 | 1.0000            | -                 | -                 | -      | -      | -      | -      | -      | -      |
| 10     | 1.0000            | 0.2027        | <b>0.0001</b> | <b>0.0001</b> | <b>&lt;0.0001</b> | <b>&lt;0.0001</b> | 0.2137 | <b>&lt;0.0001</b> | <b>&lt;0.0001</b> | -                 | -      | -      | -      | -      | -      | -      |
| 11     | 0.6511            | 1.0000        | 1.0000        | 1.0000        | 1.0000            | 0.4531            | 1.0000 | 0.0672            | 0.0065            | 0.0562            | -      | -      | -      | -      | -      | -      |
| 12     | 0.0025            | 1.0000        | 1.0000        | 1.0000        | 1.0000            | 1.0000            | 1.0000 | 1.0000            | 0.6396            | 0.0005            | 1.0000 | -      | -      | -      | -      | -      |
| 13     | <b>&lt;0.0001</b> | <b>0.0002</b> | 0.1468        | 0.6230        | 0.7382            | 1.0000            | 0.0009 | 1.0000            | 1.0000            | <b>&lt;0.0001</b> | 0.0041 | 0.2752 | -      | -      | -      | -      |
| 14     | <b>&lt;0.0001</b> | 0.0327        | 1.0000        | 1.0000        | 1.0000            | 1.0000            | 0.0949 | 1.0000            | 1.0000            | <b>&lt;0.0001</b> | 0.2963 | 1.0000 | 1.0000 | -      | -      | -      |
| 15     | <b>&lt;0.0001</b> | 0.0730        | 1.0000        | 1.0000        | 1.0000            | 1.0000            | 0.1792 | 1.0000            | 1.0000            | <b>&lt;0.0001</b> | 0.5485 | 1.0000 | 1.0000 | 1.0000 | -      | -      |
| 16     | 0.0847            | 1.0000        | 1.0000        | 1.0000        | 1.0000            | 0.5029            | 1.0000 | 0.0724            | 0.0029            | 0.0118            | 1.0000 | 1.0000 | 0.0026 | 0.3397 | 0.6511 | -      |
| 17     | <b>0.0003</b>     | 0.6308        | 1.0000        | 1.0000        | 1.0000            | 1.0000            | 1.0000 | 1.0000            | 1.0000            | <b>0.0001</b>     | 1.0000 | 1.0000 | 1.0000 | 1.0000 | 1.0000 | 1.0000 |

Branch labels are found in Fig. S3a. Bold cells show  $P$ -values significant after Bonferroni correction ( $\alpha = 0.05$ ).



**Table S8. Negative log likelihood scores used in likelihood ratio tests (LRT) to test the fit of model  $H_A$  to  $H_0$**

| Taxa included     | Gene name    | -lnL $H_0$ | -lnL $H_A$ | $2^*(H_0-H_A)$ | P-value | d.f. | Bonferroni |
|-------------------|--------------|------------|------------|----------------|---------|------|------------|
| all               | <i>rpoB</i>  | 30845.4641 | 30659.6961 | 371.5360       | 0.0000  | 1    | 0.0000     |
| all               | <i>rpoC1</i> | 16928.0848 | 16701.3552 | 453.4591       | 0.0000  | 1    | 0.0000     |
| all               | <i>rpoC2</i> | 49377.1243 | 49262.4918 | 229.2651       | 0.0000  | 1    | 0.0000     |
| all               | <i>rps11</i> | 5150.0430  | 5076.7273  | 146.6314       | 0.0000  | 1    | 0.0000     |
| all               | <i>rps2</i>  | 8053.3952  | 7952.3144  | 202.1616       | 0.0000  | 1    | 0.0000     |
| all               | <i>rps3</i>  | 10462.9379 | 10408.0313 | 109.8131       | 0.0000  | 1    | 0.0000     |
| all               | <i>cemA</i>  | 10539.6248 | 10501.8909 | 75.4677        | 0.0000  | 1    | 0.0000     |
| all               | <i>atpE</i>  | 3354.0640  | 3325.6529  | 56.8223        | 0.0000  | 1    | 0.0000     |
| all               | <i>rpl14</i> | 3853.4849  | 3826.0317  | 54.9064        | 0.0000  | 1    | 0.0000     |
| all               | <i>rps4</i>  | 5889.9077  | 5867.5889  | 44.6376        | 0.0000  | 1    | 0.0000     |
| all               | <i>atpB</i>  | 12795.6739 | 12775.5249 | 40.2979        | 0.0000  | 1    | 0.0000     |
| all               | <i>rps8</i>  | 5271.8554  | 5257.7698  | 28.1712        | 0.0000  | 1    | 0.0000     |
| all               | <i>atpF</i>  | 5801.0679  | 5788.2812  | 25.5733        | 0.0000  | 1    | 0.0000     |
| all               | <i>rps19</i> | 3566.1481  | 3553.4543  | 25.3875        | 0.0000  | 1    | 0.0000     |
| all               | <i>rps18</i> | 2476.7328  | 2464.3268  | 24.8119        | 0.0000  | 1    | 0.0000     |
| all               | <i>rps15</i> | 2916.0309  | 2904.8897  | 22.2823        | 0.0000  | 1    | 0.0000     |
| all               | <i>atpH</i>  | 1783.8555  | 1772.7967  | 22.1177        | 0.0000  | 1    | 0.0000     |
| all               | <i>rpl36</i> | 1175.2563  | 1164.6501  | 21.2123        | 0.0000  | 1    | 0.0000     |
| all               | <i>rps12</i> | 2344.5476  | 2335.4152  | 18.2649        | 0.0000  | 1    | 0.0000     |
| no Glyc,Med,Gossy | <i>rpl22</i> | 1337.9096  | 1329.0802  | 17.6588        | 0.0000  | 1    | 0.0000     |
| no Phal, Echrys   | <i>ndhA</i>  | 12458.2546 | 12450.0763 | 16.3567        | 0.0001  | 1    | 0.0072     |
| all               | <i>petD</i>  | 3817.5277  | 3809.8413  | 15.3729        | 0.0001  | 1    | 0.0072     |
| no Phal, Echrys   | <i>ndhG</i>  | 6359.7186  | 6352.4323  | 14.5726        | 0.0001  | 1    | 0.0072     |
| all               | <i>atpA</i>  | 15118.3301 | 15111.3373 | 13.9856        | 0.0002  | 1    | 0.0144     |
| all               | <i>rps7</i>  | 2988.2488  | 2981.2917  | 13.9142        | 0.0002  | 1    | 0.0144     |
| no Phal, Echrys   | <i>ndhD</i>  | 16468.8854 | 16461.9620 | 13.8467        | 0.0002  | 1    | 0.0144     |
| all               | <i>rpl16</i> | 4204.1510  | 4197.8957  | 12.5107        | 0.0004  | 1    | 0.0288     |
| no Phal, Echrys   | <i>ndhH</i>  | 11863.8184 | 11857.9901 | 11.6565        | 0.0006  | 1    | 0.0432     |
| all               | <i>petA</i>  | 10034.6283 | 10029.0822 | 11.0920        | 0.0009  | 1    | 0.0648     |
| no Phal, Echrys   | <i>ndhK</i>  | 5982.6134  | 5977.2846  | 10.6576        | 0.0011  | 1    | 0.0792     |
| all               | <i>ccsA</i>  | 12220.6267 | 12215.6045 | 10.0444        | 0.0015  | 1    | 0.1080     |
| no Pel, Pcoty     | <i>rpoA</i>  | 11459.8231 | 11454.9034 | 9.8395         | 0.0017  | 1    | 0.1224     |
| all               | <i>petB</i>  | 4913.6811  | 4908.8644  | 9.6333         | 0.0019  | 1    | 0.1368     |
| all               | <i>rps14</i> | 3128.3874  | 3123.8029  | 9.1691         | 0.0025  | 1    | 0.1800     |
| no Phal, Echrys   | <i>ndhE</i>  | 3143.4456  | 3138.9944  | 8.9024         | 0.0028  | 1    | 0.2016     |
| no Phal, Echrys   | <i>ndhC</i>  | 3036.0586  | 3031.6405  | 8.8361         | 0.0030  | 1    | 0.2160     |
| all               | <i>psbB</i>  | 12542.2190 | 12538.4331 | 7.5718         | 0.0059  | 1    | 0.4248     |
| all               | <i>petN</i>  | 549.3180   | 545.7272   | 7.1817         | 0.0074  | 1    | 0.5328     |
| no Phal, Echrys   | <i>ndhI</i>  | 4315.1437  | 4311.6213  | 7.0449         | 0.0079  | 1    | 0.5688     |
| all               | <i>psbT</i>  | 641.0695   | 637.7282   | 6.6826         | 0.0097  | 1    | 0.6984     |
| all               | <i>rbcL</i>  | 12890.5450 | 12887.5740 | 5.9420         | 0.0148  | 1    | 1.0000     |
| all               | <i>petG</i>  | 732.1408   | 729.2326   | 5.8164         | 0.0159  | 1    | 1.0000     |
| all               | <i>psaB</i>  | 16112.5066 | 16109.7271 | 5.5591         | 0.0184  | 1    | 1.0000     |
| all               | <i>psbI</i>  | 860.0936   | 857.4286   | 5.3300         | 0.0210  | 1    | 1.0000     |
| no Phal           | <i>ndhF</i>  | 2941.1020  | 2938.5093  | 5.1852         | 0.0228  | 1    | 1.0000     |
| all               | <i>rpl2</i>  | 5366.2976  | 5363.7847  | 5.0259         | 0.0250  | 1    | 1.0000     |
| all               | <i>rpl20</i> | 5252.5669  | 5250.2576  | 4.6186         | 0.0316  | 1    | 1.0000     |
| no Pop            | <i>rpl32</i> | 2300.1382  | 2298.1576  | 3.9610         | 0.0466  | 1    | 1.0000     |
| no Phal           | <i>ndhB</i>  | 1208.2257  | 1206.2558  | 3.9397         | 0.0472  | 1    | 1.0000     |
| no Phal, Echrys   | <i>ndhJ</i>  | 4441.4858  | 4439.8892  | 3.1933         | 0.0739  | 1    | 1.0000     |
| all               | <i>atpI</i>  | 6633.9899  | 6632.4017  | 3.1764         | 0.0747  | 1    | 1.0000     |
| all               | <i>matK</i>  | 21033.6178 | 21032.3196 | 2.5964         | 0.1071  | 1    | 1.0000     |
| all               | <i>rpl33</i> | 2748.6607  | 2747.4057  | 2.5099         | 0.1131  | 1    | 1.0000     |
| all               | <i>psbZ</i>  | 1492.3624  | 1491.4649  | 1.7951         | 0.1803  | 1    | 1.0000     |
| all               | <i>psbE</i>  | 1561.7736  | 1560.8801  | 1.7869         | 0.1813  | 1    | 1.0000     |
| all               | <i>psaA</i>  | 16841.1913 | 16840.3392 | 1.7043         | 0.1917  | 1    | 1.0000     |
| all               | <i>psbC</i>  | 10735.0652 | 10734.3395 | 1.4513         | 0.2283  | 1    | 1.0000     |
| no Spin           | <i>rpl23</i> | 836.0069   | 835.2962   | 1.4214         | 0.2332  | 1    | 1.0000     |
| all               | <i>psbN</i>  | 742.7416   | 742.1411   | 1.2010         | 0.2731  | 1    | 1.0000     |
| no Diosc,Med,Pop  | <i>rps16</i> | 1361.1748  | 1360.6133  | 1.1230         | 0.2893  | 1    | 1.0000     |
| all               | <i>psbJ</i>  | 958.3703   | 957.9172   | 0.9062         | 0.3411  | 1    | 1.0000     |
| no Gcaro          | <i>psbD</i>  | 7049.3826  | 7048.9460  | 0.8732         | 0.3501  | 1    | 1.0000     |
| all               | <i>psaC</i>  | 1878.3671  | 1877.9475  | 0.8392         | 0.3596  | 1    | 1.0000     |
| all               | <i>psbH</i>  | 2524.8681  | 2524.5500  | 0.6362         | 0.4251  | 1    | 1.0000     |

| Taxa included | Gene name   | -lnL H0   | -lnL HA   | 2*(H0-HA) | P-value | d.f. | Bonferroni |
|---------------|-------------|-----------|-----------|-----------|---------|------|------------|
| all           | <i>psaJ</i> | 1262.9889 | 1262.6891 | 0.5996    | 0.4387  | 1    | 1.0000     |
| all           | <i>psbF</i> | 732.6367  | 732.4236  | 0.4263    | 0.5138  | 1    | 1.0000     |
| all           | <i>psbL</i> | 562.9720  | 562.8376  | 0.2688    | 0.6042  | 1    | 1.0000     |
| all           | <i>psbA</i> | 6815.2708 | 6815.1778 | 0.1860    | 0.6663  | 1    | 1.0000     |
| all           | <i>psbM</i> | 817.2205  | 817.1431  | 0.1549    | 0.6939  | 1    | 1.0000     |
| all           | <i>psbK</i> | 1910.3696 | 1910.3685 | 0.0022    | 0.9627  | 1    | 1.0000     |
| all           | <i>psaI</i> | 1048.1031 | 1048.1026 | 0.0010    | 0.9743  | 1    | 1.0000     |
| all           | <i>petL</i> | 947.8021  | 947.8021  | 0.0000    | 0.9958  | 1    | 1.0000     |

Glyc = *Glycine*, Med = *Medicago*, Gossy = *Gossypium*, Phal = *Phalaenopsis*, Echrys = *Erodium chrysanthum*, Pel = *Pelargonum hortorum*, Pcoty = *Pelargonium cotyledonis*, Pop = *Populus*, Spin = *Spinacia*, Diosc = *Dioscorea*, Gcaro = *Geranium carolinianum*. H<sub>0</sub> and H<sub>A</sub> are described.
